# Supplementary material
Source: Springer Nature journal article supplement (https://www.springermedizin.de/resource/supplementary/12879_2012_2625_MOESM2_ESM.pdf/9445024)

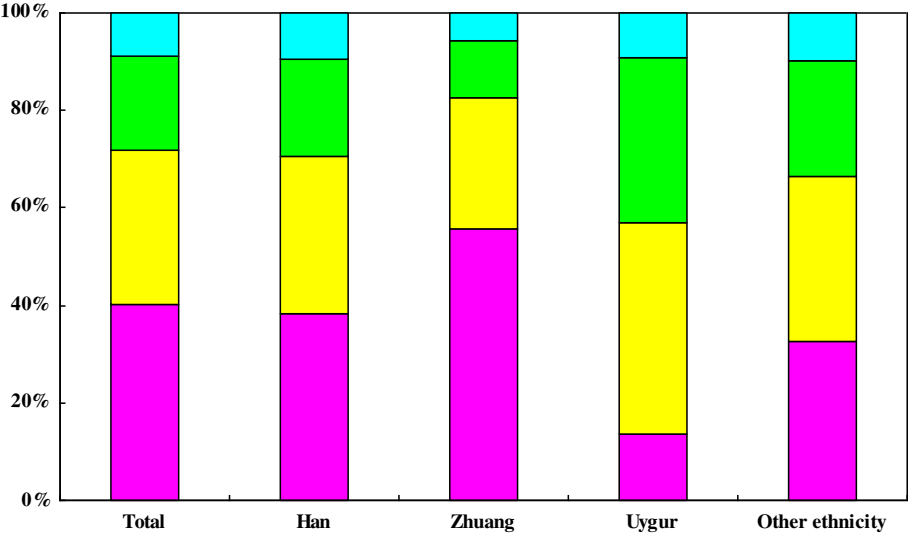

**■  $CD4 < 50 \text{ cells/mm}^3$  ■  $CD4 50-199 \text{ cells/mm}^3$  ■  $CD4 200-349 \text{ cells/mm}^3$  ■  $CD4 \geq 350 \text{ cells/mm}^3$**

Supplement: MOESM2 [file 9445024]
